# Supplementary material for: Thermo conductive carbon nanotube-framed membranes for skin heat signal-responsive transdermal drug delivery
Source: Royal Society of Chemistry journal article supplement (doi:10.1039/c7py00570a), 2017-01-01
Supplement: c7py00570a1.pdf [file c7py00570a1.pdf]

**Supplementary Material of**

**Thermo Conductive Carbon Nanotube-framed Membrane for Skin Heat Signal-Responsive Transdermal Drug Delivery**

Ji-Hye Kang, Han-Sem Kim, and Ueon Sang Shin\*

Department of Nanobiomedical Science & BK21 PLUS NBM Global Research Center for Regenerative Medicine, Dankook University, Chungnam, Cheonan, 330-714, Republic of Korea

Institute of Tissue Regeneration Engineering (ITREN), Dankook University, Chungnam, Cheonan, 330-714, Republic of Korea

\* Corresponding author: e-mail) usshin12@dankook.ac.kr; tel) +82 41 550 3691, fax) +82 41 559 7839

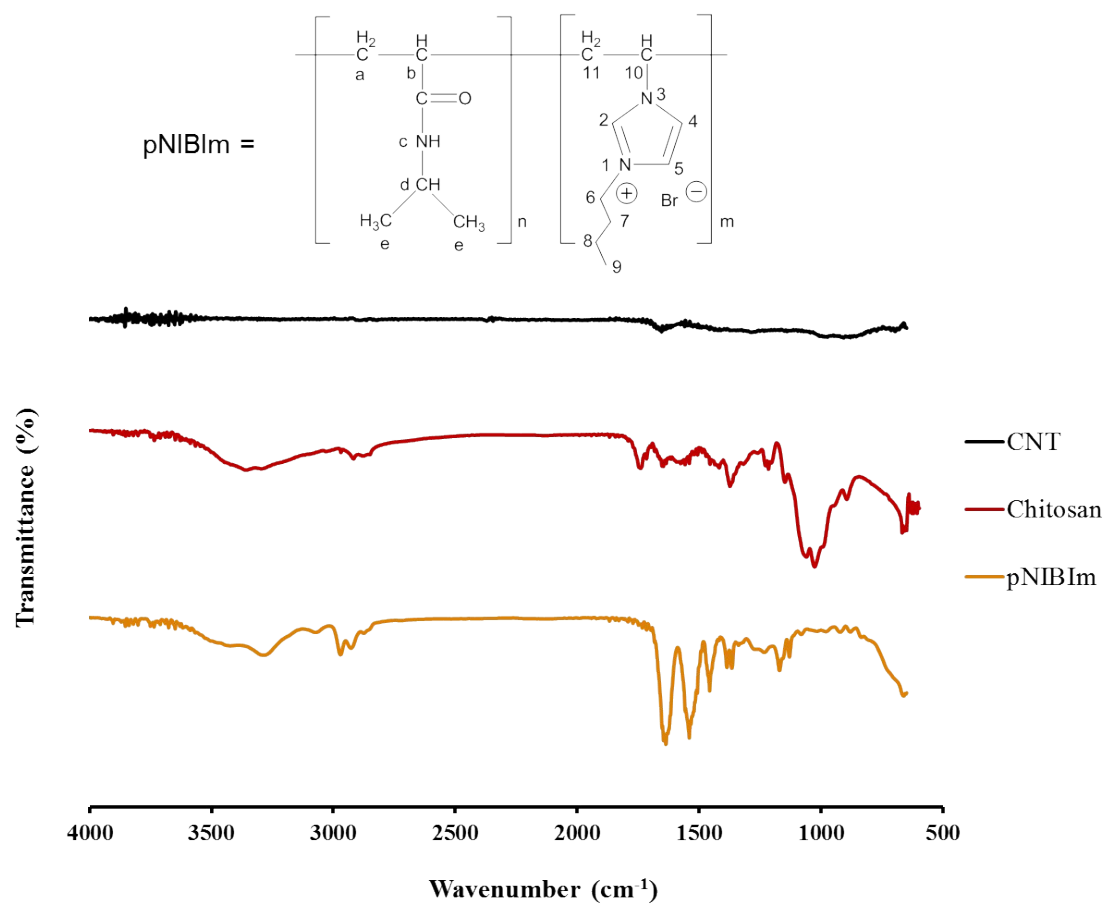

**Fig S1.** FT-IR spectra of pure Chit, CNT, and pNIBIm samples as reference materials.

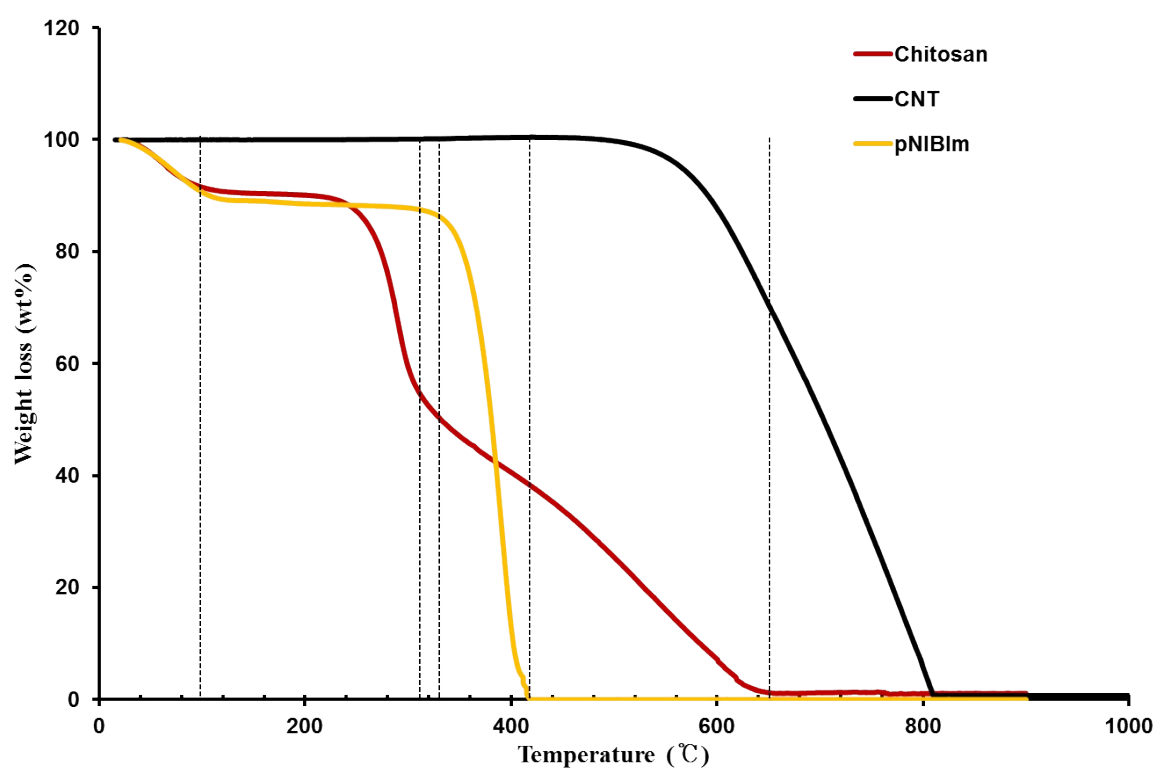

**Fig S2.** Thermogram curves of pure CNTs, Chit, and pNIBIm as references.

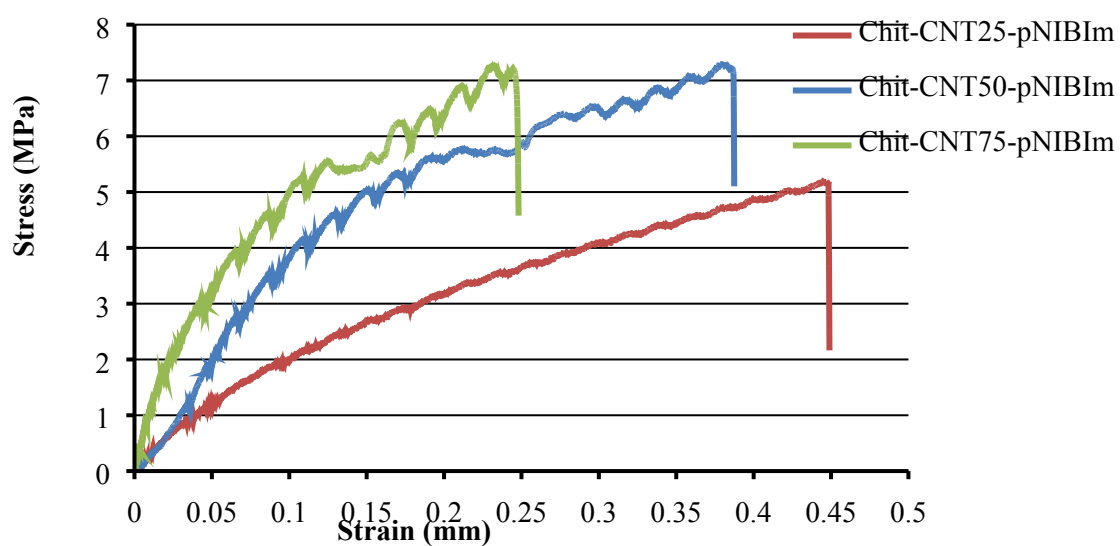

**Fig S3.** Stress-strain curves of Chit-CNT25-pNIBIm, Chit-CNT50-pNIBIm, and Chit-CNT75-pNIBIm membrane samples.

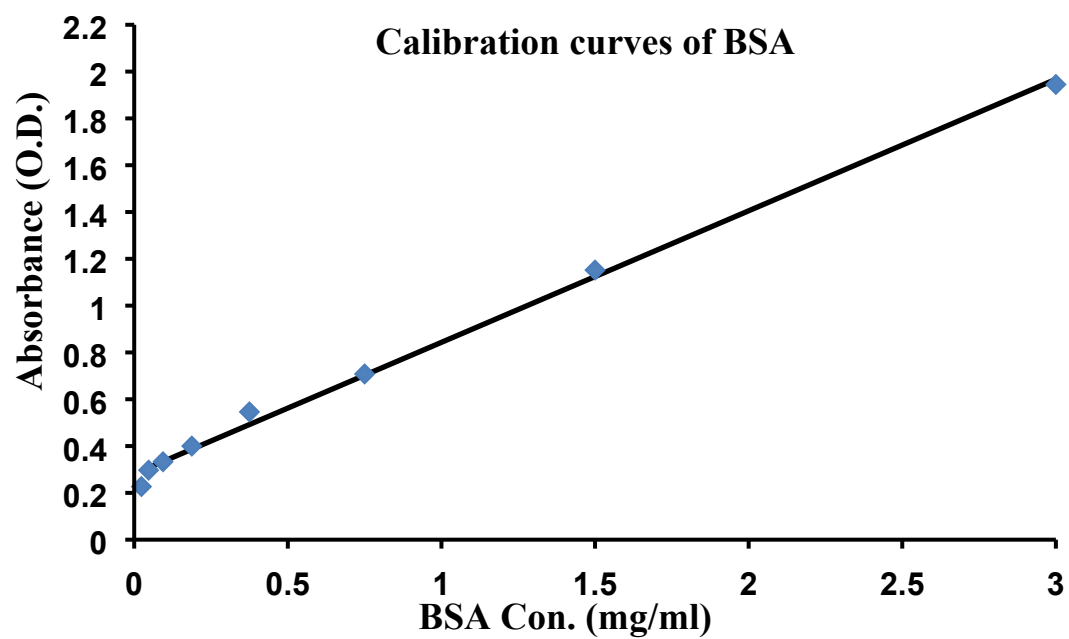

**Fig. S4** The calibration curve determined by a UV-Vis spectrometer at wavelength of 280 nm over the range of 0.05-3 mg/ml of BSA solution in PBS.
